# Supplementary material for: Quantitative proteomics of patient fibroblasts reveal biomarkers and diagnostic signatures of mitochondrial disease
Source: PubMed Central journal article supplement (PMC11530135; doi:10.1172/jci.insight.178645), 2024-10-22
Supplement: jciinsight-9-178645-s124.pdf [file jciinsight-9-178645-s124.pdf]

A

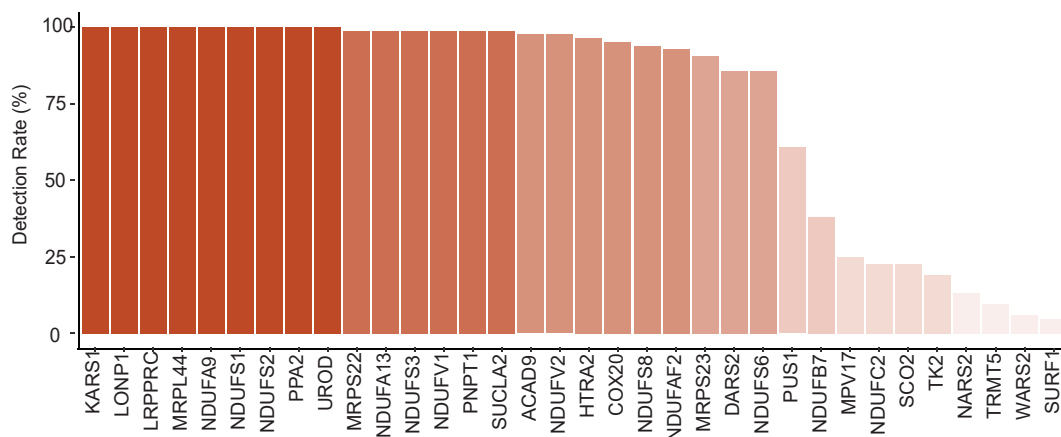

B

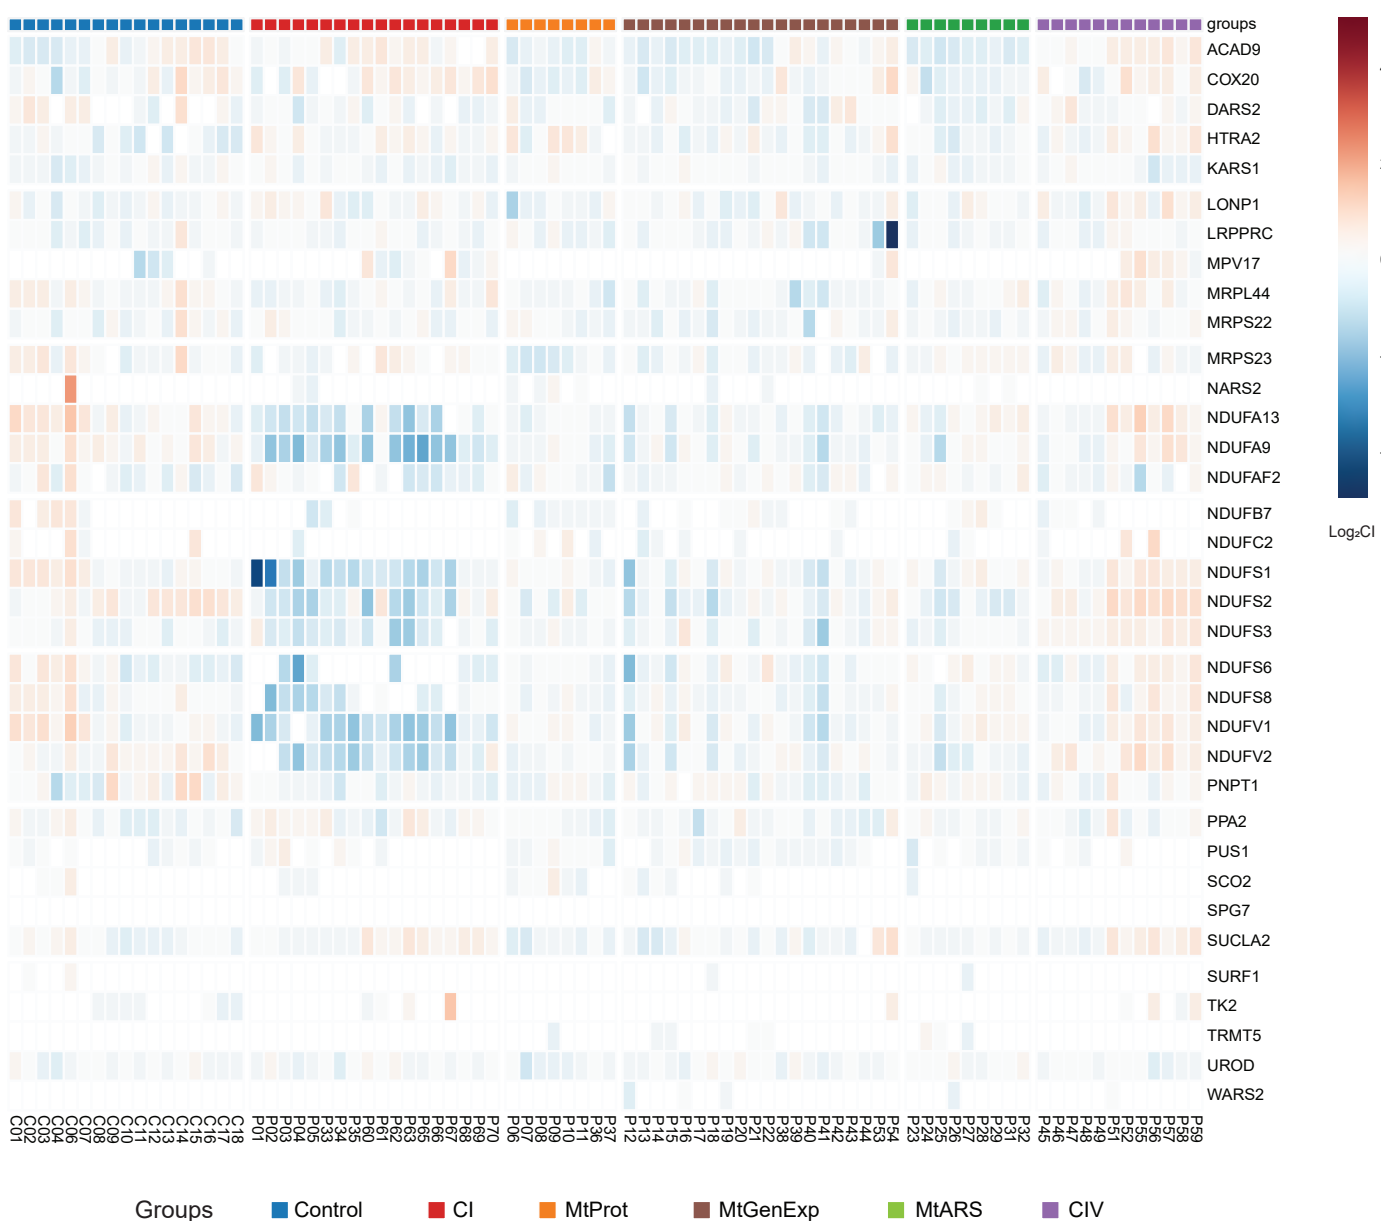

Supplemental Figure 1.

(A) Detection rate (%) of proteins encoded by the genes of interest in the cohort. Rate was determined as number of cases where protein was identified divided by the total number of cases (84). (B) Heatmap showing  $\text{Log}_2$  centered intensities ( $\text{Log}_2\text{CI}$ ) of proteins encoded by the genes of interest in the patient cohort. Protein intensities were normalized to median intensity value of the entire cohort and  $\text{Log}_2$  adjusted ( $\text{Log}_2\text{CI}$ ) and are coloured accordingly. Blank cells signify that the protein was not detected in the analysis. Further information in Supplemental Data File 1.

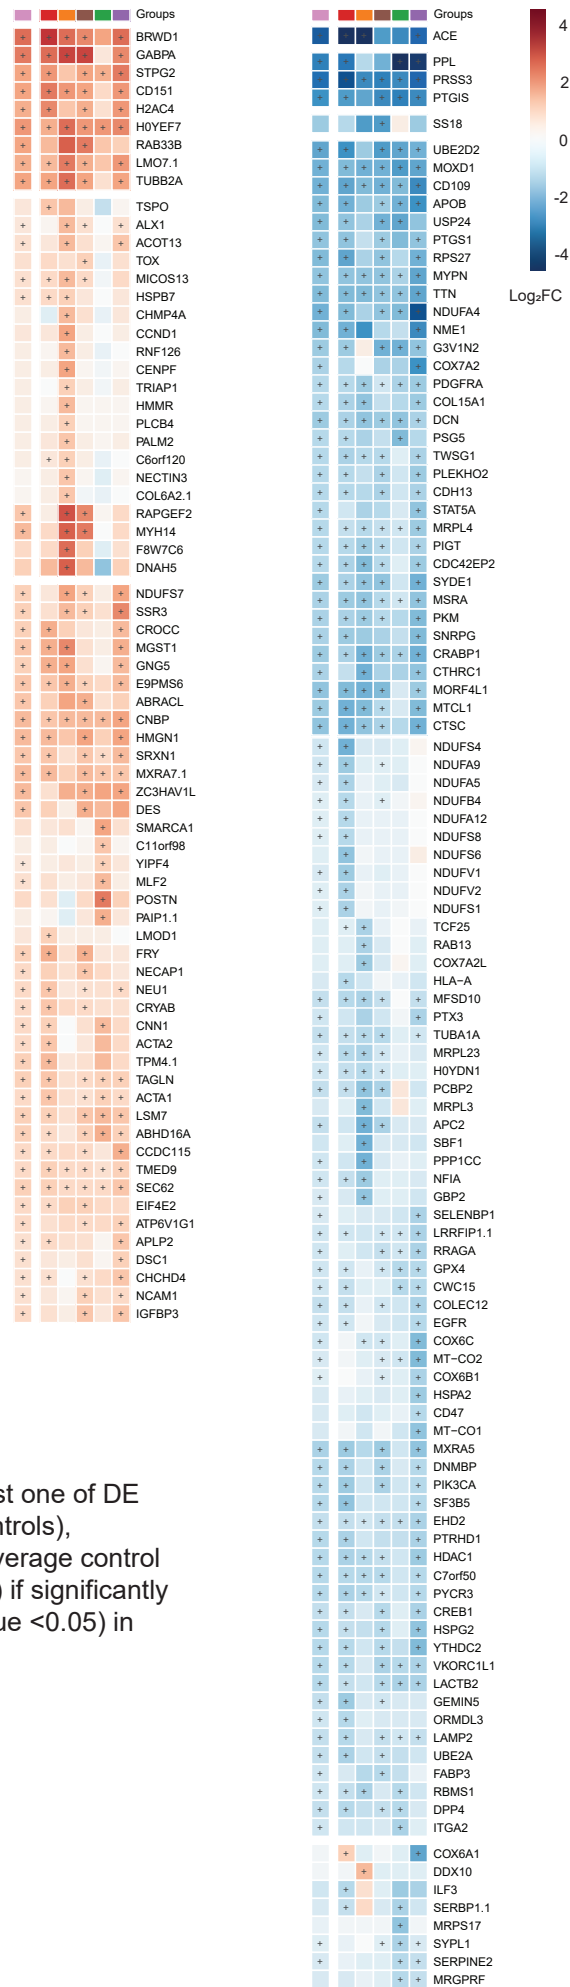

Supplemental Figure 2.

Heatmap of proteins identified in at least one of DE comparisons (cohort groups versus controls), coloured by Log<sub>2</sub> fold-change versus average control (Log<sub>2</sub>FC) and further annotated with (+) if significantly differentially expressed (adjusted p-value < 0.05) in the specific comparison.



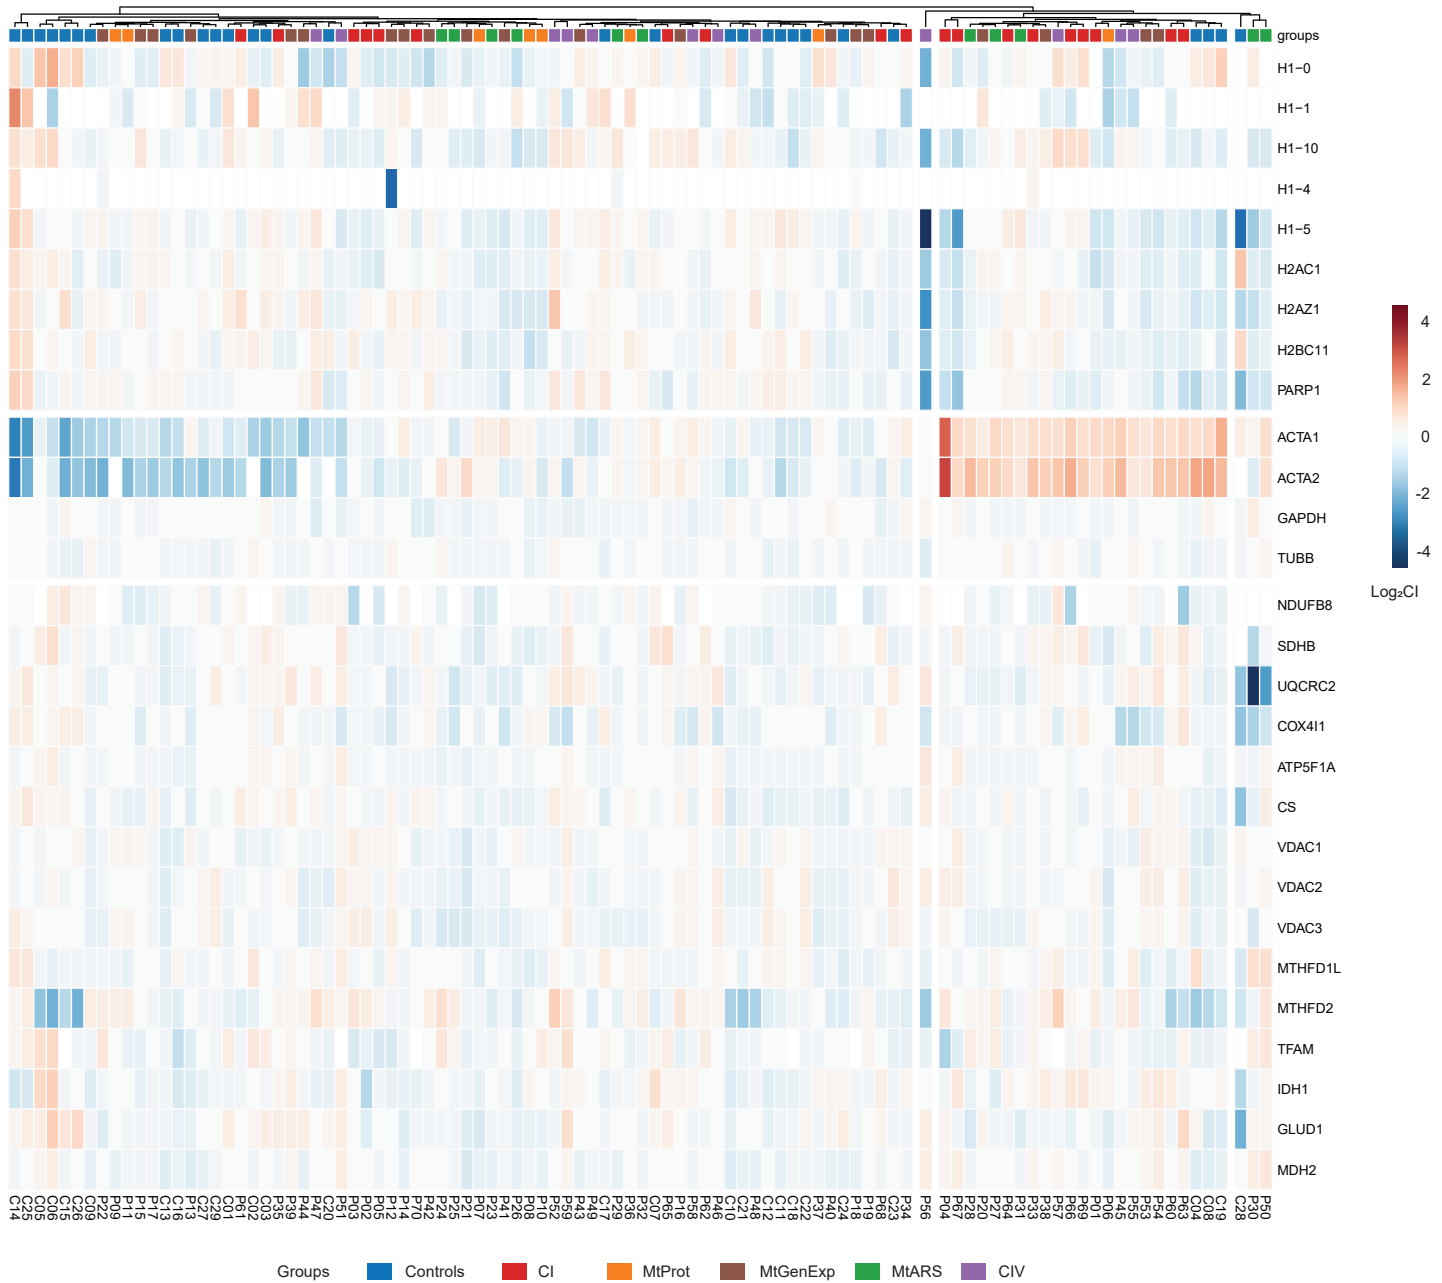

Supplemental Figure 4.

Heatmap of specific high expression proteins involved in nuclear, cytosolic and mitochondrial functions in all samples. Protein intensities were normalized to median intensity value of the entire cohort and Log<sub>2</sub> adjusted (Log<sub>2</sub>CI) and are coloured accordingly. Blank cells signify that the protein was not detected in the analysis.

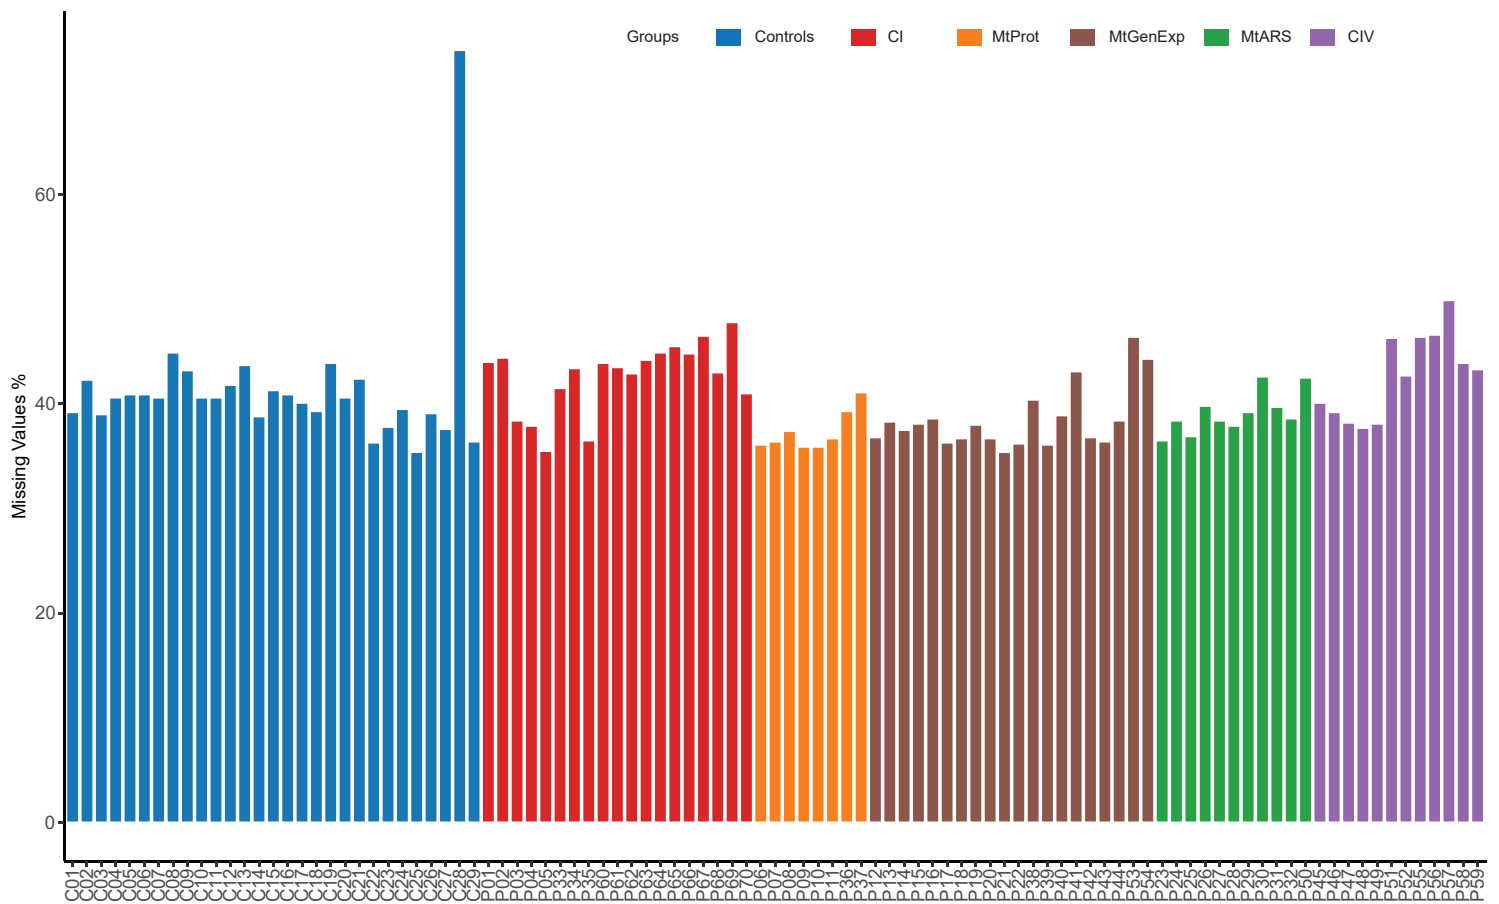

Supplemental Figure 5.

Missing value rate (%) obtained for each sample prior to filtering. Rate was determined as number of missing values divided by total number of proteins detected in the cohort (5888). Colour denotes cohort groups, blue = controls, red = CI, orange = MtProt, brown = MtGenExp, green = MtARS and purple = CIV.

**A**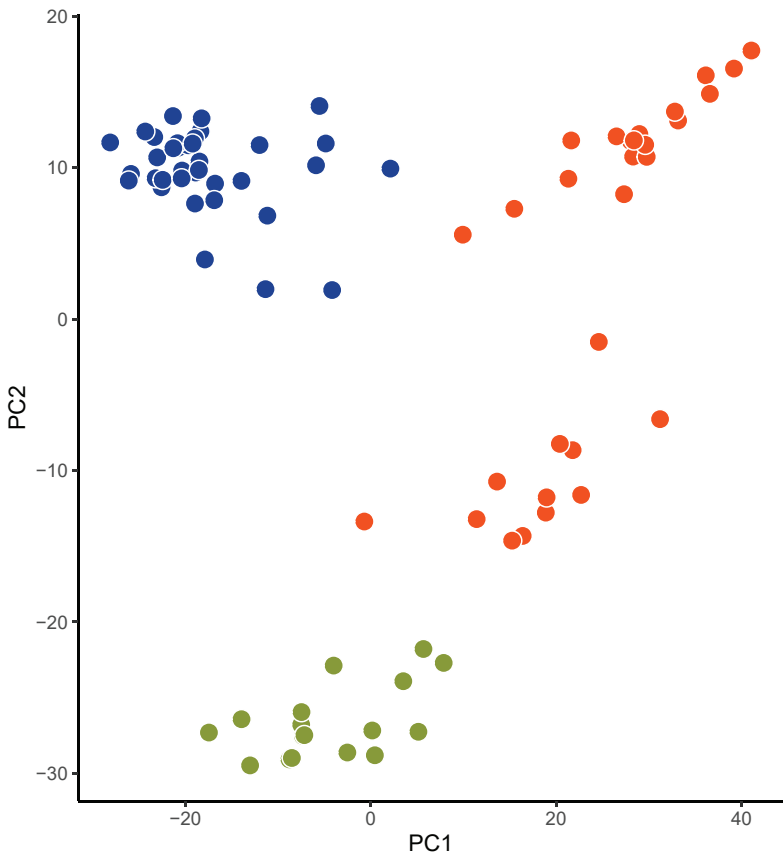**B**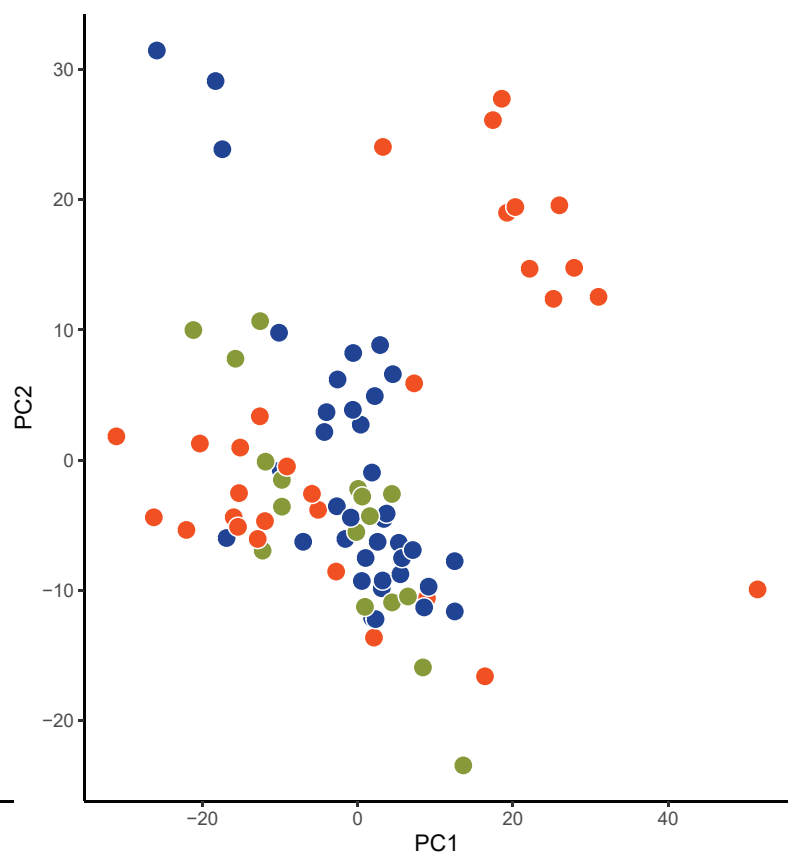**C**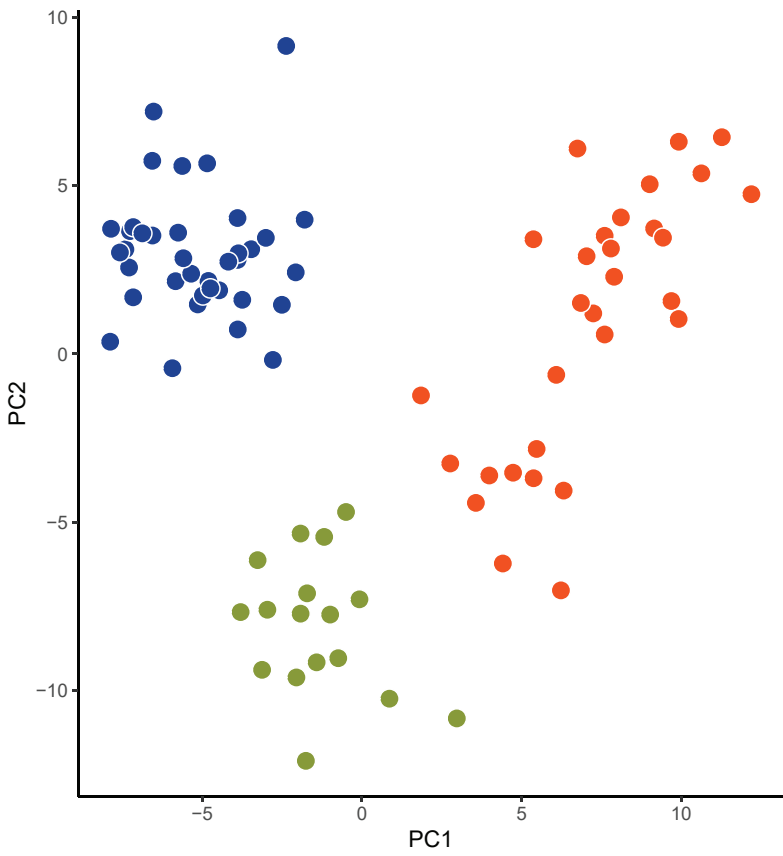**D**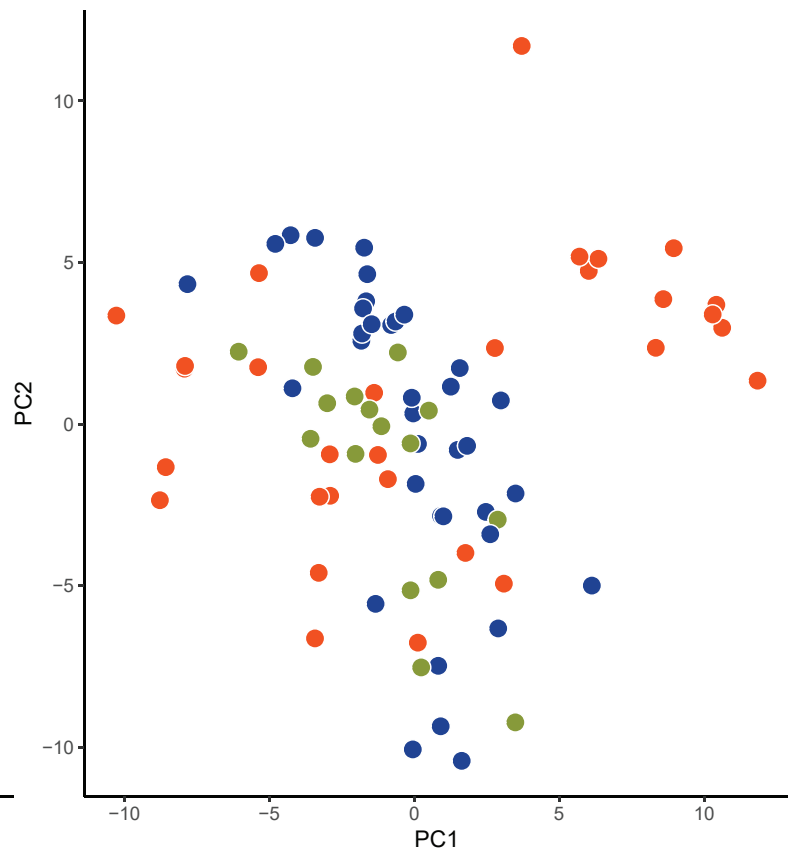

Batch ● 1 ● 2 ● 3

Supplemental Figure 6.

Principal component analysis (PCA) plots before batch-correction of total proteome (A) and mitoproteome (C) datasets. PCA plots after batch-correction of (B) total proteome and (D) mitoproteome datasets. Circle colours denote batch number, blue = batch 1, green = batch 2, orange = batch 3.
